# Supplementary material for: A Temperature/pH Double-Responsive and Physical Double-Crosslinked Hydrogel Based on PLA and Histidine
Source: MDPI journal article supplement (doi:10.3390/gels8090570), 2022-09-07
Supplement: s1 [file s1]

# A Temperature/pH Double-Responsive and Physical Double-Crosslinked Hydrogel Based on PLA and Histidine

Qingrong Wu, Yu Fu, Wanying Yang and Shouxin Liu \*

Key Laboratory of Applied Surface and Colloid Chemistry, Ministry of Education, School of Chemistry and Chemical Engineering, Shaanxi Normal University, Xi'an 710119, China

\* Correspondence: liushx@snnu.edu.cn; Tel.: +86-29-8153-0781

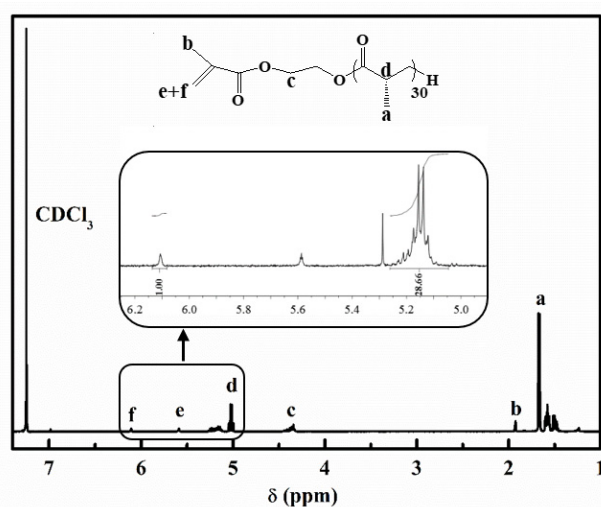

Figure S1. <sup>1</sup>H NMR spectra of macromonomer HEMA-PDLA<sub>30</sub>.

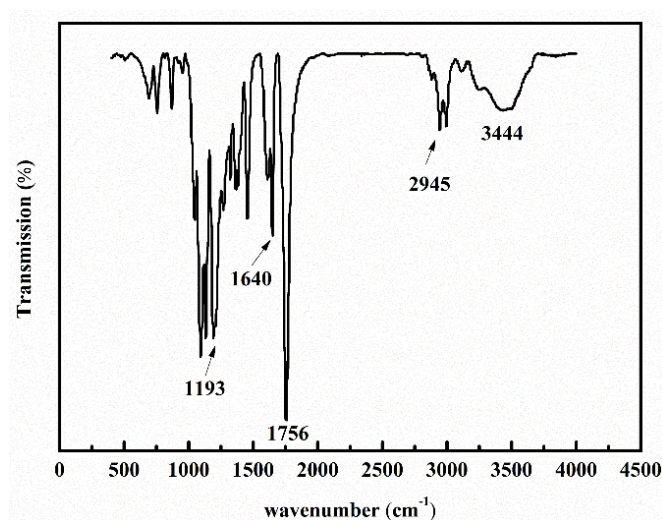

Figure S2. FTIR spectra of macromonomer HEMA-PDLA<sub>30</sub>.

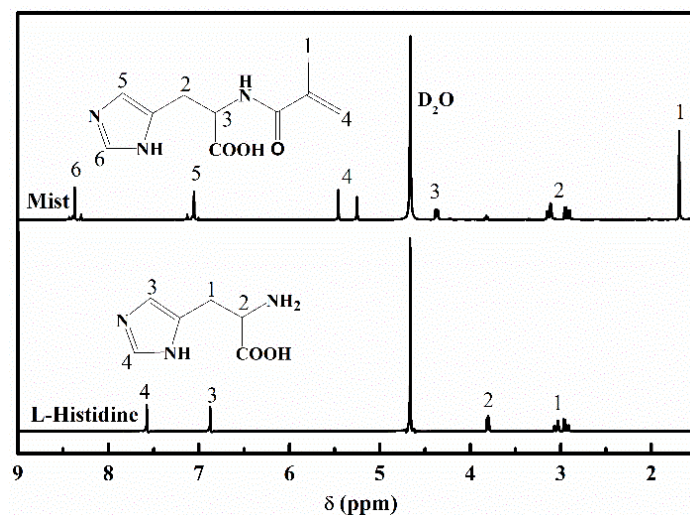

**Figure S3.**  $^1\text{H}$  NMR spectra of Mist and L-Histidine monomers.

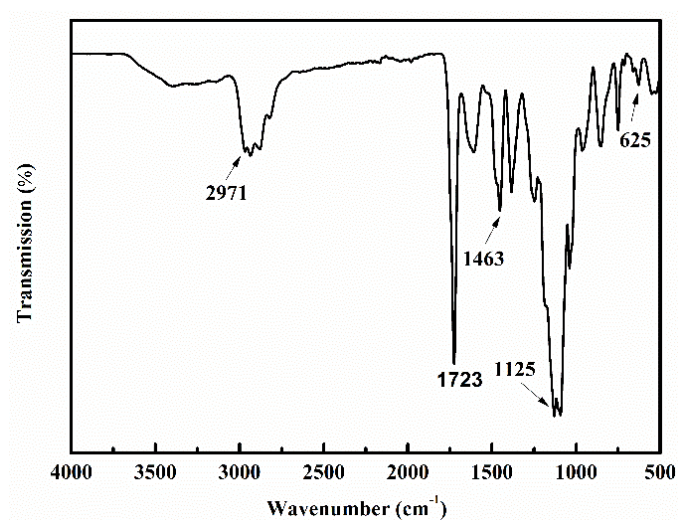

**Figure S4.** FTIR spectra of temperature / pH double-responsive and physical double-crosslinked hydrogel.

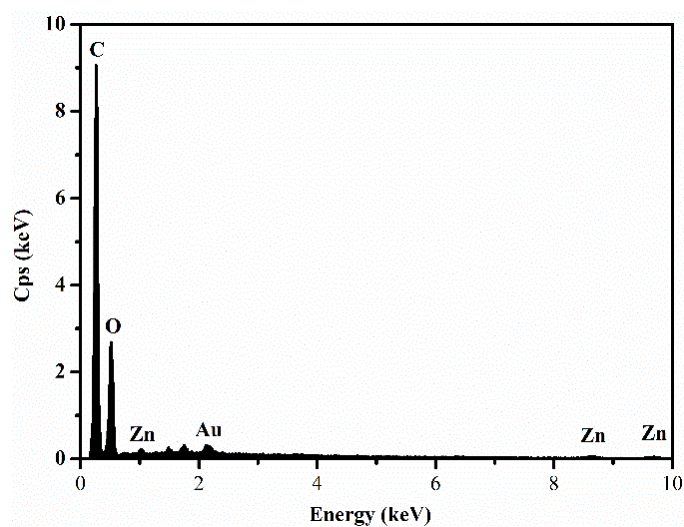

**Figure S5.** EDAX of double-crosslinked hydrogel.
